# Supplementary material for: Genetic diversity assessment of the indigenous goat population of Benin using microsatellite markers
Source: Front Genet. 2023 Mar 17;14:1079048. doi: 10.3389/fgene.2023.1079048 (PMC10064012; doi:10.3389/fgene.2023.1079048)
Supplement: Supplementary file 2 [file DataSheet1.xlsx]

## Sheet: DATA_BRUT_954
		ILSTS11										ILSTS5				MAF065																							MCM527						SCRSP9
	Vegetation zones	264	266	268	270	272	274	276	278	280	282	184	188	190	192	118	120	122	124	126	128	130	132	134	136	138	145	147	159	165	167	169	171	173	175	177	179	183	153	155	162	164	166	168	117	121	123	125	127
1	Guineo-congolaise								278				188							126			132																153	155							123
2	Guineo-congolaise								278	280			188			118				126																			153							121
3	Guineo-congolaise								278				188											134															153				166					125
4	Guineo-congolaise								278	280			188																			169										164				121		125
5	Guineo-congolaise								278				188										132									169										164	166			121	123
6	Guineo-congolaise								278	280			188										132																153			164				121
7	Guineo-congolaise								278				188					122																					153			164						125
8	Guineo-congolaise								278	280			188					122					132																153									125
9	Guineo-congolaise								278	280			188											134												177			153							121	123
10	Guineo-congolaise								278				188				120															169										164						125
11	Guineo-congolaise								278				188				120							134																155		164						125
12	Guineo-congolaise								278				188										132																153			164					123
13	Guineo-congolaise									280		184	188										132													177			153			164				121
14	Guineo-congolaise								278				188										132									169										164				121		125
15	Guineo-congolaise								278			184	188										132	134																155		164						125
16	Guineo-congolaise								278				188											134								169								155		164				121
17	Guineo-congolaise								278				188											134																		164					123
18	Guineo-congolaise								278				188										132	134															153							121	123
19	Guineo-congolaise								278				188										132																			164					123	125
20	Guineo-congolaise		266						278				188										132																			164
21	Guineo-congolaise								278	280			188											134															153			164
22	Guineo-congolaise							276	278				188																			169	171									164	166				123
23	Guineo-congolaise							276	278				188					122						134															153				166				123	125
24	Guineo-congolaise								278				188										132																	155							123
25	Guineo-congolaise								278				188											134																		164				121	123
26	Guineo-congolaise								278	280		184	188										132									169							153			164						125
27	Guineo-congolaise								278				188										132				145												153	155							123	125
28	Guineo-congolaise								278				188											134																		164				121	123
29	Guineo-congolaise								278	280			188					122						134																155						121	123
30	Guineo-congolaise							276		280			188											134															153			164				121	123
31	Guineo-congolaise								278	280			188											134			145												153			164				121
32	Guineo-congolaise								278				188										132				145															164	166			121
33	Guineo-congolaise							276		280			188			118						130																	153			164					123	125
34	Guineo-congolaise			268						280		184	188												136							169										164						125
35	Guineo-congolaise								278			184	188										132		136																	164						125
36	Guineo-congolaise								278				188										132	134															153							121		125
37	Guineo-congolaise									280			188			118								134																		164				121	123
38	Guineo-congolaise							276	278				188										132										171						153			164				121
39	Guineo-congolaise								278				188																				171						153				166			121	123
40	Guineo-congolaise								278	280			188										132																			164				121	123
41	Guineo-congolaise							276	278				188					122																								164				121		125
42	Guineo-congolaise								278				188					122					132																			164	166			121	123
43	Guineo-congolaise			268				276					188										132									169							153			164					123
44	Guineo-congolaise			268						280			188										132									169							153			164					123
45	Guineo-congolaise								278	280			188											134																155		164					123
46	Guineo-congolaise								278	280			188								128					138														155		164				121
47	Guineo-congolaise								278				188			118							132																153			164					123
48	Guineo-congolaise									280			188	190									132									169							153							121
49	Guineo-congolaise								278				188										132	134																		164				121
50	Guineo-congolaise							276		280			188										132	134																		164						125
51	Guineo-congolaise							276	278				188										132																			164						125
52	Guineo-congolaise								278	280			188			118							132																			164					123
53	Guineo-congolaise								278				188										132				145													155			166				123
54	Guineo-congolaise								278	280			188			118																169								155		164
55	Guineo-congolaise								278				188														145												153			164					123
56	Guineo-congolaise								278				188			118								134															153								123
57	Guineo-congolaise								278				188										132	134															153			164						125
58	Guineo-congolaise							276	278			184	188					122									145															164
59	Guineo-congolaise								278	280			188	190				122					132																153			164				121		125
60	Guineo-congolaise								278	280			188					122					132																153				166			121	123
61	Guineo-congolaise									280			188										132	134																		164
62	Guineo-congolaise								278	280			188										132	134																		164				121
63	Guineo-congolaise								278	280			188										132	134																		164					123
64	Guineo-congolaise									280			188											134															153				166			121
65	Guineo-congolaise			268						280			188										132				145												153			164					123	125
66	Guineo-congolaise								278				188														145					169							153			164
67	Guineo-congolaise								278				188			118								134															153
68	Guineo-congolaise								278				188			118								134															153	155							123
69	Guineo-congolaise								278				188										132									169							153			164					123	125
70	Guineo-congolaise							276	278			184	188																			169			175					155							123
71	Guineo-congolaise									280			188					122																	175							164					123
72	Guineo-congolaise							276	278				188					122														169							153			164					123	125
73	Guineo-congolaise								278	280			188										132																	155							123
74	Guineo-congolaise		266							280			188										132						159										153								123
75	Guineo-congolaise								278	280			188										132									169								155							123	125
76	Guineo-congolaise								278				188					122														169										164				121	123
77	Guineo-congolaise								278				188										132	134															153					168		121		125
78	Guineo-congolaise								278	280			188				120							134																		164	166				123
79	Guineo-congolaise								278	280			188											134																155		164				121
80	Guineo-congolaise								278		282		188			118							132																			164	166
81	Guineo-congolaise								278				188										132																153	155
82	Guineo-congolaise								278				188				120						132																			164					123	125
83	Guineo-congolaise								278	280			188										132																	155		164					123	125
84	Guineo-congolaise								278	280			188										132																		162	164					123
85	Guineo-congolaise								278				188			118							132																			164				121		125
86	Guineo-congolaise								278				188										132	134															153	155								125
87	Guineo-congolaise								278				188										132				145												153			164					123	125
88	Guineo-congolaise								278	280			188											134			145												153								123	125
89	Guineo-congolaise		266						278				188				120								136														153			164					123
90	Guineo-congolaise								278	280			188				120	122																					153				166			121	123
91	Guineo-congolaise		266						278				188				120							134															153	155							123	125
92	Guineo-congolaise								278				188										132	134															153				166			121	123
93	Guineo-congolaise								278				188										132				145												153			164					123	125
94	Guineo-congolaise								278	280			188			118							132																153			164
95	Guineo-congolaise								278	280			188	190				122						134															153				166				123
96	Guineo-congolaise									280			188											134															153					168				125
97	Guineo-congolaise								278				188										132																153			164					123
98	Guineo-congolaise								278				188					122						134															153				166
99	Guineo-congolaise								278	280			188										132	134																		164					123
100	Guineo-congolaise								278	280			188	190			120						132																153				166			121	123
101	Guineo-congolaise							276	278				188																			169								155		164					123
102	Guineo-congolaise			268					278				188											134																		164	166			121	123
103	Guineo-congolaise								278				188				120							134																155							123
104	Guineo-congolaise									280			188										132	134															153	155							123
105	Guineo-congolaise								278				188											134								169										164	166			121
106	Guineo-congolaise								278	280			188											134																155				168
107	Guineo-congolaise								278				188				120	122																								164	166
108	Guineo-congolaise								278				188					122						134															153	155						121
109	Guineo-congolaise							276	278				188											134															153				166			121
110	Guineo-congolaise								278	280			188											134								169							153			164					123	125
111	Guineo-congolaise								278				188										132										171							155		164				121
112	Guineo-congolaise								278				188										132									169							153	155							123
113	Guineo-congolaise							276	278				188					122						134																		164	166
114	Guineo-congolaise								278				188	190										134		138														155		164					123
115	Guineo-congolaise								278	280			188										132	134																		164
116	Guineo-congolaise								278	280			188										132										171						153			164				121
117	Guineo-congolaise								278				188					122					132																			164		168			123	125
118	Guineo-congolaise								278				188										132	134																		164	166				123
119	Guineo-congolaise								278	280			188											134									171							155		164				121
120	Guineo-congolaise								278	280			188					122						134															153			164
121	Guineo-congolaise								278				188							126													171						153								123
122	Guineo-congolaise								278				188							126												169										164		168
123	Guineo-congolaise								278				188					122				130																	153	155								125
124	Guineo-congolaise								278		282		188										132																	155			166			121	123
125	Guineo-congolaise								278				188										132																153			164					123
126	Guineo-congolaise								278				188										132																153			164				121
127	Guineo-congolaise								278	280			188										132	134																			166	168
128	Guineo-congolaise								278	280			188					122						134																		164		168		121
129	Guineo-congolaise							276		280			188					122		126																						164	166			121
130	Guineo-congolaise								278				188											134		138																164	166				123
131	Guineo-congolaise								278				188											134	136														153			164					123	125
132	Guineo-congolaise								278	280			188				120						132																153
133	Guineo-congolaise								278			184	188			118								134																		164	166			121	123
134	Guineo-congolaise								278				188			118		122																					153			164				121	123
135	Guineo-congolaise								278	280			188					122						134																155		164
136	Guineo-congolaise								278	280			188					122						134															153	155
137	Guineo-congolaise							276	278				188											134															153	155							123
138	Guineo-congolaise								278				188					122																					153				166
139	Guineo-congolaise								278				188				120																						153			164
140	Guineo-congolaise								278				188					122														169								155		164				121	123
141	Guineo-congolaise								278				188					122						134															153				166				123
142	Guineo-congolaise								278	280			188											134								169							153	155						121		125
143	Guineo-congolaise			268									188					122							136															155			166				123	125
144	Guineo-congolaise								278	280			188											134	136														153			164					123
145	Guineo-congolaise				270				278				188					122																						155							123
146	Guineo-congolaise								278				188					122																									166				123
147	Guineo-congolaise								278				188				120							134															153	155
148	Guineo-congolaise								278				188					122					132																	155		164					123	125
149	Guineo-congolaise								278				188				120							134																155			166
150	Guineo-congolaise									280			188					122															171						153	155							123	125
151	Guineo-congolaise								278				188										132	134															153	155
152	Guineo-congolaise								278				188			118								134																		164	166				123
153	Guineo-congolaise								278				188										132																			164				121
154	Guineo-congolaise								278	280			188										132	134															153	155								125
155	Guineo-congolaise							276	278				188				120															169								155			166						127
156	Guineo-congolaise								278				188					122						134																		164					123
157	Guineo-congolaise								278				188				120							134																		164	166				123
158	Guineo-congolaise		266							280			188				120										145												153			164
159	Guineo-congolaise								278				188				120						132																	155			166				123
160	Guineo-congolaise								278				188										132									169							153				166				123
161	Guineo-congolaise							276	278				188										132																			164	166
162	Guineo-congolaise								278	280			188											134								169							153			164				121
163	Guineo-congolaise								278	280			188											134								169							153
164	Guineo-congolaise								278	280			188											134						165									153
165	Guineo-congolaise								278	280			188											134								169										164				121
166	Guineo-congolaise								278	280			188					122														169							153				166			121	123
167	Guineo-congolaise								278				188										132																153				166				123
168	Guineo-congolaise							276		280			188											134								169								155		164					123
169	Guineo-congolaise								278				188										132									169								155		164
170	Guineo-congolaise								278				188										132																			164	166
171	Guineo-congolaise								278				188											134									171									164					123	125
172	Guineo-congolaise								278				188	190											136							169							153				166			121
173	Guineo-congolaise								278				188					122					132																			164	166			121
174	Guineo-congolaise							276	278				188											134	136															155								125
175	Guineo-congolaise								278				188												136							169								155			166			121	123
176	Guineo-congolaise								278	280			188	190			120	122																					153				166			121
177	Guineo-congolaise								278	280			188											134								169								155		164					123
178	Guineo-congolaise								278				188											134								169										164	166			121
179	Guineo-congolaise								278				188											134																		164	166			121
180	Guineo-congolaise								278				188					122						134																		164				121
181	Guineo-congolaise								278				188										132																153			164					123
182	Guineo-congolaise								278				188											134								169										164					123
183	Guineo-congolaise								278				188	190										134								169							153	155
184	Guineo-congolaise				270				278				188	190				122							136														153
185	Guineo-congolaise								278				188					122														169								155		164
186	Guineo-congolaise								278				188																			169							153	155							123
187	Guineo-congolaise							276	278				188										132	134															153	155							123	125
188	Guineo-congolaise								278	280			188					122					132																	155		164					123
189	Guineo-congolaise							276	278				188											134									171						153	155						121
190	Guineo-congolaise								278				188					122																					153			164						125
191	Guineo-congolaise								278	280			188				120							134															153				166				123
192	Guineo-congolaise									280			188										132										171						153	155
193	Guineo-congolaise								278				188					122						134															153			164					123
194	Guineo-congolaise								278				188										132	134																		164						125
195	Guineo-congolaise								278				188	190																		169	171						153				166				123
196	Guineo-congolaise								278				188											134																		164	166
197	Guineo-congolaise								278	280			188	190										134															153			164					123
198	Guineo-congolaise								278			184	188										132																153	155						121	123
199	Guineo-congolaise								278				188					122					132																153				166				123
200	Guineo-congolaise								278	280			188											134								169							153			164				121
201	Guineo-congolaise								278				188					122					132																153			164
202	Guineo-congolaise								278				188										132	134															153			164				121		125
203	Guineo-congolaise								278	280			188											134								169								155			166			121		125
204	Guineo-congolaise								278				188			118								134																		164					123
205	Guineo-congolaise							276	278				188	190				122						134																155			166				123
206	Guineo-congolaise								278				188											134																155		164					123
207	Guineo-congolaise								278	280			188				120	122																								164	166				123
208	Guineo-congolaise								278	280			188					122						134																		164	166					125
209	Guineo-congolaise								278				188				120															169										164					123
210	Guineo-congolaise									280		184	188					122					132																153			164					123
211	Guineo-congolaise								278				188										132										171						153			164				121
212	Guineo-congolaise								278				188							126												169							153			164				121		125
213	Guineo-congolaise								278				188			118							132																153								123
214	Guineo-congolaise								278				188											134																			166					125
215	Guineo-congolaise								278	280			188							126			132																			164	166			121
216	Guineo-congolaise								278				188										132									169							153			164					123
217	Guineo-congolaise								278	280			188										132	134															153			164				121	123
218	Guineo-congolaise								278	280			188											134									171						153
219	Guineo-congolaise								278	280		184	188										132																			164					123
220	Guineo-congolaise								278	280			188				120			126																			153			164				121	123
221	Guineo-congolaise								278	280			188											134								169							153			164				121
222	Guineo-congolaise								278				188	190		118		122																								164	166			121		125
223	Guineo-congolaise								278	280			188	190			120															169							153							121
224	Guineo-congolaise								278	280			188				120						132																	155		164
225	Guineo-congolaise								278	280			188				120							134																155		164					123
226	Guineo-congolaise								278	280			188										132	134															153			164					123
227	Guineo-congolaise							276	278				188											134								169							153			164				121
228	Guineo-congolaise								278		282		188										132																153
229	Guineo-congolaise								278				188				120							134																		164	166				123
230	Guineo-congolaise								278				188										132																153							121	123
231	Guineo-congolaise								278				188					122														169							153	155							123
232	Guineo-congolaise								278	280			188											134															153							121		125
233	Guineo-congolaise								278	280			188										132	134															153	155						121	123
234	Guineo-congolaise								278	280			188										132																			164	166				123	125
235	Guineo-congolaise								278	280			188				120																						153			164				121
236	Guineo-congolaise								278	280			188										132	134															153							121
237	Guineo-congolaise								278	280		184	188										132	134															153			164					123
238	Guineo-congolaise							276		280			188										132	134																		164					123	125
239	Guineo-congolaise								278				188										132	134																		164				121	123
240	Guineo-congolaise								278	280			188									130	132																153				166			121	123
241	Guineo-congolaise								278	280			188					122											159													164	166				123
242	Guineo-congolaise								278	280			188										132									169										164	166				123	125
243	Guineo-congolaise								278				188										132									169										164						125
244	Guineo-congolaise								278				188											134								169										164					123	125
245	Guineo-congolaise								278				188																			169						183	153			164				121		125
246	Guineo-congolaise								278				188										132									169							153				166				123	125
247	Guineo-congolaise								278	280			188																			169						183				164	166					125
248	Guineo-congolaise								278				188											134								169							153			164					123	125
249	Guineo-congolaise								278				188					122											159										153			164					123
250	Guineo-congolaise								278				188					122						134															153			164				121		125
251	Guineo-congolaise								278	280			188			118								134															153							121		125
252	Guineo-congolaise									280			188										132	134															153				166				123
253	Guineo-congolaise									280			188											134								169										164					123
254	Guineo-congolaise									280			188			118								134															153			164				121
255	Guineo-congolaise								278				188										132	134																155			166			121		125
256	Guineo-congolaise								278				188										132				145												153			164				121		125
257	Guineo-congolaise									280			188										132										171									164				121
258	Guineo-congolaise								278				188				120															169										164						125
259	Guineo-congolaise								278	280			188										132																			164					123
260	Guineo-congolaise								278	280			188				120															169										164					123
261	Guineo-congolaise								278				188	190										134																		164	166				123
262	Guineo-congolaise								278				188										132	134																		164					123	125
263	Guineo-congolaise								278				188					122					132																	155		164
264	Guineo-congolaise								278				188																			169										164						125
265	Guineo-congolaise									280			188										132																	155			166			121	123
266	Guineo-congolaise								278	280			188										132																153
267	Guineo-congolaise								278				188											134								169										164						125
268	Guineo-congolaise								278	280			188	190										134														183	153	155							123
269	Guineo-congolaise								278			184	188										132	134																		164					123	125
270	Guineo-congolaise								278	280		184	188				120																						153								123
271	Guineo-congolaise								278	280			188											134								169								155			166					125
272	Guineo-congolaise								278	280			188				120							134																155		164
273	Guineo-congolaise								278	280			188										132																153	155							123
274	Guineo-congolaise								278				188											134								169										164					123
275	Guineo-congolaise								278				188				120							134																		164					123
276	Guineo-congolaise								278				188										132																			164
277	Guineo-congolaise								278				188										132																			164				121
278	Guineo-congolaise								278				188										132									169							153									125
279	Guineo-congolaise							276			282	184	188			118							132																153				166			121	123
280	Guineo-congolaise								278	280			188										132	134															153			164				121
281	Guineo-congolaise							276		280			188			118																169							153			164					123
282	Guineo-congolaise								278				188					122					132																153	155						121	123
283	Guineo-congolaise								278				188	190									132																153			164				121
284	Guineo-congolaise								278	280			188										132																			164				121	123
285	Guineo-congolaise								278	280			188			118							132																	155		164				121	123
286	Guineo-congolaise								278	280			188										132																153			164
287	Guineo-congolaise								278				188														145						171						153			164					123
288	Guineo-congolaise								278				188										132																			164				121	123
289	Guineo-congolaise									280			188														145					169								155		164					123
290	Guineo-congolaise								278	280			188										132										171						153	155							123
291	Guineo-congolaise								278	280			188			118	120																						153			164				121
292	Guineo-congolaise								278				188										132	134															153							121	123
293	Guineo-congolaise								278	280			188					122					132																			164				121
294	Guineo-congolaise								278				188					122						134																		164					123
295	Guineo-congolaise								278	280			188											134																		164
296	Guineo-congolaise				270				278				188										132	134																		164				121	123
297	Guineo-congolaise								278				188										132																153			164				121
298	Guineo-congolaise								278	280			188			118																169										164				121		125
299	Guineo-congolaise								278	280			188											134			145															164						125
300	Guineo-congolaise								278				188										132																			164	166				123
301	Guineo-congolaise								278				188											134								169							153	155								125
302	Guineo-congolaise								278				188										132	134																		164				121
303	Guineo-congolaise								278	280			188										132	134																		164					123	125
304	Guineo-congolaise								278				188										132										171							155		164				121
305	Guineo-congolaise								278				188					122					132																			164						125
306	Guineo-congolaise								278	280			188					122					132																			164				121
307	Guineo-congolaise								278				188										132																153	155								125
308	Guineo-congolaise								278				188																			169											166			121	123
309	Guineo-congolaise								278				188														145						171									164
310	Guineo-congolaise								278				188											134																		164				121	123
311	Guineo-congolaise								278				188										132	134															153			164				121	123
312	Guineo-congolaise								278			184	188										132									169										164	166				123
313	Guineo-congolaise									280			188										132		136															155		164					123	125
314	Guineo-congolaise								278	280			188														145					169							153	155							123
315	Guineo-congolaise								278				188											134			145															164					123	125
316	Guineo-congolaise								278				188										132																	155		164					123
317	Guineo-congolaise								278	280			188	190										134								169							153	155
318	Guineo-congolaise								278				188					122									145												153							121		125
319	Guineo-congolaise								278				188														145					169										164
320	Guineo-congolaise								278				188											134		138														155		164						125
321	Guineo-congolaise								278				188			118		122																					153	155								125
322	Guineo-congolaise								278	280			188					122								138														155		164				121
323	Guineo-congolaise								278	280			188										132	134															153				166			121
324	Guineo-congolaise								278				188										132																	155		164				121	123
325	Guineo-congolaise								278				188										132	134															153			164
326	Guineo-congolaise								278	280			188										132			138													153				166			121
327	Guineo-congolaise								278	280			188										132			138														155			166			121
328	Guineo-congolaise								278				188										132	134															153			164						125
329	Guineo-congolaise								278	280			188											134																155		164					123
330	Guineo-congolaise								278				188										132									169										164						125
331	Guineo-congolaise							276	278				188										132																153			164					123
332	Guineo-congolaise								278	280			188			118									136															155		164					123
333	Guineo-congolaise								278				188										132			138																164
334	Guineo-congolaise								278				188										132	134																		164				121
335	Guineo-congolaise							276	278				188			118							132																153
336	Guineo-congolaise								278				188										132																153			164						125
337	Guineo-congolaise								278	280			188										132									169										164
338	Guineo-congolaise								278				188							126			132																153				166			121		125
339	Guineo-congolaise								278				188										132									169										164						125
340	Guineo-congolaise								278				188					122						134																155		164					123
341	Guineo-congolaise								278				188					122					132																153			164					123
342	Guineo-congolaise								278				188			118							132																			164					123
343	Guineo-congolaise							276	278				188					122					132																	155		164					123
344	Guineo-congolaise								278				188				120																171						153								123
345	Guineo-congolaise								278				188										132	134															153			164				121	123
346	Guineo-congolaise								278				188	190									132																			164					123
347	Guineo-congolaise								278	280			188			118				126																							166				123
348	Guineo-congolaise								278	280			188										132										171									164					123
349	Guineo-congolaise								278	280			188										132																153	155							123
350	Guineo-congolaise								278				188										132																153			164				121		125
351	Guineo-congolaise								278	280			188					122					132																153			164					123
352	Guineo-congolaise							276	278				188					122					132																	155						121	123
353	Guineo-congolaise								278				188					122					132																			164				121	123
354	Guineo-congolaise								278	280			188																				171						153	155
355	Guineo-congolaise								278				188										132																153			164
356	Guineo-congolaise								278				188										132																153			164
357	Guineo-congolaise								278				188										132																	155		164				121		125
358	Guineo-congolaise								278				188				120							134															153			164				121	123
359	Guineo-congolaise								278	280			188										132									169										164						125
360	Guineo-congolaise							276	278				188										132									169										164	166				123
361	Guineo-congolaise								278				188					122					132																153			164						125
362	Guineo-congolaise							276	278				188										132	134															153				166				123	125
363	Guineo-congolaise									280			188					122		126																			153									125
364	Guineo-congolaise								278	280			188										132	134															153				166			121	123
365	Guineo-congolaise							276		280			188										132				145													155		164					123
366	Guineo-congolaise								278				188										132										171						153			164						125
367	Guineo-congolaise							276	278				188			118																169										164	166			121
368	Guineo-congolaise								278				188					122															171									164				121
369	Guineo-congolaise							276	278				188	190									132																	155		164
370	Guineo-congolaise								278	280			188										132			138													153			164					123
371	Guineo-congolaise								278				188																				171	173					153	155
372	Guineo-congolaise								278				188																		167									155		164					123
373	Guineo-congolaise							276		280			188										132	134																		164					123
374	Guineo-congolaise								278				188										132				145															164				121
375	Guineo-congolaise								278	280			188										132																	155			166				123
376	Guineo-congolaise								278	280			188										132																153	155						121
377	Guineo-congolaise								278				188					122					132									169										164				121
378	Guineo-Soudanienne								278	280			188											134																		164	166			121
379	Guineo-Soudanienne								278				188										132	134																		164						125
380	Guineo-Soudanienne									280			188										132	134																		164	166				123
381	Guineo-Soudanienne								278				188										132	134																		164				121			127
382	Guineo-Soudanienne							276	278				188										132																153			164				121
383	Guineo-Soudanienne								278				188					122					132																153			164				121		125
384	Guineo-Soudanienne								278				188										132																153			164					123
385	Guineo-Soudanienne								278	280			188	190									132																153	155						121
386	Guineo-Soudanienne								278				188									130										169										164					123	125
387	Guineo-Soudanienne								278	280			188										132																153	155							123
388	Guineo-Soudanienne								278	280			188										132	134															153			164
389	Guineo-Soudanienne								278				188					122					132																	155		164				121
390	Guineo-Soudanienne								278			184	188											134								169							153	155						121		125
391	Guineo-Soudanienne								278				188										132	134																155		164					123
392	Guineo-Soudanienne								278				188										132	134															153			164						125
393	Guineo-Soudanienne			268					278				188											134	136														153				166				123
394	Guineo-Soudanienne								278	280			188										132									169								155		164					123	125
395	Guineo-Soudanienne								278	280			188											134															153							121
396	Guineo-Soudanienne									280	282		188										132																153			164				121	123
397	Guineo-Soudanienne								278				188										132																153			164					123
398	Guineo-Soudanienne								278				188										132			138																164						125
399	Guineo-Soudanienne								278			184	188										132	134															153	155						121
400	Guineo-Soudanienne								278				188										132	134															153	155								125
401	Guineo-Soudanienne								278				188	190									132				145												153			164
402	Guineo-Soudanienne								278	280			188										132																	155		164				121		125
403	Guineo-Soudanienne								278	280		184	188										132									169								155		164				121
404	Guineo-Soudanienne								278				188					122					132																153			164						125
405	Guineo-Soudanienne								278				188						124					134																		164				121
406	Guineo-Soudanienne								278	280			188																			169				177			153							121
407	Guineo-Soudanienne								278				188										132										171									164					123
408	Guineo-Soudanienne							276	278				188										132									169							153								123
409	Guineo-Soudanienne								278				188										132								167								153	155							123
410	Guineo-Soudanienne								278				188										132									169							153	155							123
411	Guineo-Soudanienne								278				188					122					132																153	155						121
412	Guineo-Soudanienne								278				188			118								134																		164					123
413	Guineo-Soudanienne								278				188					122					132																	155		164
414	Guineo-Soudanienne								278	280			188										132	134															153							121
415	Guineo-Soudanienne								278	280			188											134								169							153			164						125
416	Guineo-Soudanienne							276	278				188										132															183				164
417	Guineo-Soudanienne								278	280			188																			169						183	153			164				121
418	Guineo-Soudanienne								278				188												136					165									153				166
419	Guineo-Soudanienne								278				188			118							132																153			164					123
420	Guineo-Soudanienne								278				188					122																				183	153
421	Guineo-Soudanienne								278				188					122					132																153			164
422	Guineo-Soudanienne								278	280			188	190				122					132																			164						125
423	Guineo-Soudanienne								278				188	190				122					132																				166				123
424	Guineo-Soudanienne								278		282		188					122															171							155		164				121	123
425	Guineo-Soudanienne								278	280			188			118							132																			164					123
426	Guineo-Soudanienne								278				188					122					132																	155			166					125
427	Guineo-Soudanienne								278				188			118							132																153							121
428	Guineo-Soudanienne								278	280		184	188										132	134																		164				121		125
429	Guineo-Soudanienne								278				188			118								134																		164	166			121		125
430	Guineo-Soudanienne								278	280			188					122																						155			166			121
431	Guineo-Soudanienne								278	280			188			118							132																153			164				121		125
432	Guineo-Soudanienne								278				188			118										138														155			166				123
433	Guineo-Soudanienne								278	280			188	190				122					132																153				166				123
434	Guineo-Soudanienne							276	278				188										132										171						153				166			121
435	Guineo-Soudanienne			268					278				188				120							134																		164	166				123
436	Guineo-Soudanienne								278				188											134									171						153			164					123
437	Guineo-Soudanienne								278				188							126			132																	155
438	Guineo-Soudanienne								278	280			188										132									169							153			164					123
439	Guineo-Soudanienne									280			188			118		122																					153			164					123
440	Guineo-Soudanienne								278				188										132	134																		164	166			121
441	Guineo-Soudanienne								278	280			188				120							134																		164
442	Guineo-Soudanienne								278				188										132	134															153			164					123
443	Guineo-Soudanienne								278				188										132	134															153			164					123
444	Guineo-Soudanienne									280			188											134															153								123
445	Guineo-Soudanienne								278				188										132			138													153							121
446	Guineo-Soudanienne							276	278			184	188					122																					153			164				121
447	Guineo-Soudanienne								278	280			188														145			165												164						125
448	Guineo-Soudanienne								278				188			118		122																					153			164					123
449	Guineo-Soudanienne								278				188										132									169							153							121
450	Guineo-Soudanienne								278			184	188										132																			164				121
451	Guineo-Soudanienne								278	280			188											134																		164					123
452	Guineo-Soudanienne								278				188	190									132	134																		164
453	Guineo-Soudanienne								278	280			188										132																			164					123
454	Guineo-Soudanienne							276	278				188				120							134																155							123	125
455	Guineo-Soudanienne								278				188					122					132																153			164						125
456	Guineo-Soudanienne								278				188											134															153	155						121
457	Guineo-Soudanienne								278	280		184	188											134															153			164
458	Guineo-Soudanienne								278	280			188										132																153			164						125
459	Guineo-Soudanienne								278	280			188										132				145												153			164
460	Guineo-Soudanienne								278	280			188			118									136															155			166				123
461	Guineo-Soudanienne								278				188													138						169										164
462	Guineo-Soudanienne								278	280			188					122					132																			164				121
463	Guineo-Soudanienne								278	280			188							126			132																			164					123
464	Guineo-Soudanienne								278	280			188					122		126																			153			164					123
465	Guineo-Soudanienne							276	278				188										132	134															153	155							123
466	Guineo-Soudanienne								278	280			188										132																153			164					123
467	Guineo-Soudanienne								278				188											134	136														153			164					123
468	Guineo-Soudanienne								278	280			188											134															153			164
469	Guineo-Soudanienne								278	280			188										132	134															153				166				123
470	Guineo-Soudanienne								278				188																			169										164					123
471	Guineo-Soudanienne								278	280			188				120							134																		164					123
472	Guineo-Soudanienne								278				188					122														169								155			166
473	Guineo-Soudanienne		266						278				188										132	134																	162						123	125
474	Guineo-Soudanienne							276	278				188							126		130																					166				123
475	Guineo-Soudanienne							276	278				188									130	132																153	155
476	Guineo-Soudanienne								278	280			188	190				122					132																153				166
477	Guineo-Soudanienne								278	280			188											134															153				166				123
478	Guineo-Soudanienne							276	278				188											134															153		162
479	Guineo-Soudanienne									280			188							126							145												153			164				121	123
480	Guineo-Soudanienne									280			188	190				122					132																			164					123
481	Guineo-Soudanienne								278	280			188					122					132																	155			166				123
482	Guineo-Soudanienne								278	280			188				120			126																						164					123
483	Guineo-Soudanienne								278	280			188					122		126																			153								123
484	Guineo-Soudanienne								278				188							126							145												153								123
485	Guineo-Soudanienne							276	278				188							126				134																		164					123
486	Guineo-Soudanienne								278				188											134			145													155		164					123
487	Guineo-Soudanienne								278				188					122						134																155			166				123
488	Guineo-Soudanienne								278	280			188											134															153			164				121
489	Guineo-Soudanienne								278				188											134																	162	164					123	125
490	Guineo-Soudanienne								278	280			188					122					132																153								123
491	Guineo-Soudanienne								278				188	190									132	134															153								123	125
492	Guineo-Soudanienne								278	280			188					122						134																155			166			121
493	Guineo-Soudanienne									280			188														145												153			164					123
494	Guineo-Soudanienne								278	280			188				120	122																					153							121
495	Guineo-Soudanienne								278				188					122						134															153			164					123
496	Guineo-Soudanienne								278				188	190				122					132																153								123
497	Guineo-Soudanienne			268					278				188							126				134																		164	166			121
498	Guineo-Soudanienne								278		282		188	190				122		126																			153								123	125
499	Guineo-Soudanienne								278	280			188							126			132																153			164				121
500	Guineo-Soudanienne								278				188										132	134																155		164					123
501	Guineo-Soudanienne								278				188										132																	155		164					123	125
502	Guineo-Soudanienne								278				188					122																					153				166
503	Guineo-Soudanienne								278				188	190				122		126																			153
504	Guineo-Soudanienne								278				188											134	136														153			164						125
505	Guineo-Soudanienne								278				188					122																					153			164					123
506	Guineo-Soudanienne							276	278				188	190								130		134															153				166			121	123
507	Guineo-Soudanienne								278				188											134																		164					123
508	Guineo-Soudanienne								278	280			188					122		126																			153				166
509	Guineo-Soudanienne								278			184	188				120							134															153			164					123
510	Guineo-Soudanienne								278	280			188											134															153				166			121
511	Guineo-Soudanienne								278				188										132			138													153	155						121	123
512	Guineo-Soudanienne								278				188											134																		164	166				123
513	Guineo-Soudanienne								278				188	190									132	134															153	155
514	Guineo-Soudanienne	264								280		184	188				120																										166			121
515	Guineo-Soudanienne								278		282		188	190										134			145													155		164					123
516	Guineo-Soudanienne								278				188										132		136															155			166				123
517	Guineo-Soudanienne								278	280			188	190										134				147											153
518	Guineo-Soudanienne								278	280			188					122						134															153			164					123
519	Guineo-Soudanienne								278				188	190				122			128																		153
520	Guineo-Soudanienne								278				188											134																		164	166				123
521	Guineo-Soudanienne								278				188					122						134															153			164				121
522	Guineo-Soudanienne								278				188					122							136														153			164				121
523	Guineo-Soudanienne								278				188									130		134															153	155
524	Guineo-Soudanienne							276	278				188					122					132																	155		164					123
525	Guineo-Soudanienne								278				188										132																153	155							123
526	Guineo-Soudanienne								278				188					122					132																	155			166				123
527	Guineo-Soudanienne								278				188	190									132																153				166				123
528	Guineo-Soudanienne								278				188	190									132																153			164					123
529	Guineo-Soudanienne								278	280			188										132																	155		164					123
530	Guineo-Soudanienne								278			184	188							126			132																153			164					123
531	Guineo-Soudanienne		266						278				188				120							134															153			164					123
532	Guineo-Soudanienne								278				188					122				130																	153
533	Guineo-Soudanienne								278	280			188										132																153			164
534	Guineo-Soudanienne								278				188										132	134															153	155							123
535	Guineo-Soudanienne								278				188					122						134																		164			117
536	Guineo-Soudanienne								278				188											134																		164					123
537	Guineo-Soudanienne								278	280			188					122					132																	155			166				123
538	Guineo-Soudanienne							276	278				188					122						134															153				166				123
539	Guineo-Soudanienne								278	280			188				120										145													155		164					123
540	Guineo-Soudanienne									280			188	190				122					132																153				166			121
541	Guineo-Soudanienne								278				188				120							134															153
542	Guineo-Soudanienne								278				188	190									132	134															153								123
543	Guineo-Soudanienne								278	280			188										132														179		153	155						121		125
544	Guineo-Soudanienne								278				188										132	134															153				166
545	Guineo-Soudanienne								278	280			188				120							134																155			166			121
546	Guineo-Soudanienne								278	280			188											134																		164
547	Guineo-Soudanienne								278				188											134															153			164							127
548	Guineo-Soudanienne								278				188				120	122																					153				166			121
549	Guineo-Soudanienne							276	278				188	190				122						134																		164	166
550	Guineo-Soudanienne								278	280			188										132	134																155
551	Guineo-Soudanienne								278				188	190									132	134															153	155						121
552	Guineo-Soudanienne								278				188					122					132																153	155						121	123
553	Guineo-Soudanienne								278				188										132	134															153	155						121
554	Guineo-Soudanienne								278	280				190									132																	155		164
555	Guineo-Soudanienne							276		280			188	190				122					132																	155		164					123
556	Guineo-Soudanienne								278				188					122						134																		164					123
557	Guineo-Soudanienne								278				188	190									132	134															153				166			121
558	Guineo-Soudanienne								278	280			188				120						132																153			164
559	Guineo-Soudanienne								278	280			188				120							134															153				166				123
560	Guineo-Soudanienne								278	280			188										132	134															153
561	Guineo-Soudanienne								278					190			120						132																	155			166
562	Guineo-Soudanienne								278	280			188										132	134																		164					123
563	Guineo-Soudanienne								278	280			188					122					132																			164					123
564	Guineo-Soudanienne								278				188					122						134															153				166
565	Guineo-Soudanienne							276	278				188	190									132	134																155								125
566	Guineo-Soudanienne								278				188	190										134																		164				121
567	Guineo-Soudanienne		266	268									188							126				134																155						121
568	Guineo-Soudanienne								278				188					122		126																				155								125
569	Guineo-Soudanienne			268					278				188			118								134															153	155							123
570	Guineo-Soudanienne			268					278				188			118																								155							123
571	Guineo-Soudanienne								278	280			188							126				134																		164					123		127
572	Guineo-Soudanienne								278				188							126				134															153	155						121	123
573	Guineo-Soudanienne								278				188	190										134															153			164					123
574	Guineo-Soudanienne								278				188							126			132																			164	166					125
575	Guineo-Soudanienne								278				188							126				134															153				166
576	Guineo-Soudanienne								278	280			188							126			132																153				166			121	123
577	Guineo-Soudanienne								278	280			188										132	134															153
578	Guineo-Soudanienne								278	280			188											134															153			164					123	125
579	Guineo-Soudanienne								278				188										132	134															153								123
580	Guineo-Soudanienne								278	280			188					122					132																153			164					123
581	Guineo-Soudanienne								278				188				120							134															153								123
582	Guineo-Soudanienne								278				188					122						134															153	155
583	Guineo-Soudanienne								278				188					122						134																155		164				121
584	Guineo-Soudanienne								278				188				120																						153			164					123
585	Guineo-Soudanienne								278				188										132	134															153			164					123
586	Guineo-Soudanienne								278				188												136														153			164					123
587	Guineo-Soudanienne								278				188							126			132																	155		164						125
588	Guineo-Soudanienne								278				188			118							132																153			164
589	Guineo-Soudanienne		266						278				188											134																		164						125
590	Guineo-Soudanienne									280			188											134																155			166				123	125
591	Guineo-Soudanienne								278	280			188					122						134																155								125	127
592	Guineo-Soudanienne								278	280			188											134																155		164					123
593	Guineo-Soudanienne							276	278				188				120							134															153	155							123
594	Guineo-Soudanienne								278				188											134																155							123
595	Guineo-Soudanienne								278	280			188					122																						155		164					123
596	Guineo-Soudanienne								278	280			188					122						134																155		164					123	125
597	Guineo-Soudanienne								278	280			188	190									132	134																155		164					123
598	Guineo-Soudanienne								278	280			188				120																							155							123		127
599	Guineo-Soudanienne								278				188				120	122																					153				166				123
600	Guineo-Soudanienne								278				188										132	134																		164	166				123
601	Guineo-Soudanienne									280			188				120							134																155		164					123
602	Guineo-Soudanienne								278				188										132	134																		164	166				123
603	Guineo-Soudanienne								278	280			188				120							134															153			164					123
604	Guineo-Soudanienne							276		280			188										132	134																155		164						125
605	Guineo-Soudanienne								278				188					122						134																155		164				121	123
606	Guineo-Soudanienne								278				188										132	134																			166				123
607	Guineo-Soudanienne								278					190				122						134																155		164
608	Guineo-Soudanienne							276		280			188										132	134																155		164					123
609	Guineo-Soudanienne								278				188										132	134																	162						123
610	Guineo-Soudanienne							276	278				188											134	136																162		166				123	125
611	Guineo-Soudanienne									280			188										132	134															153			164
612	Guineo-Soudanienne								278	280			188					122						134																155							123	125
613	Guineo-Soudanienne								278				188					122																					153	155							123
614	Guineo-Soudanienne								278				188					122					132																153	155							123
615	Guineo-Soudanienne		266						278				188			118													159													164				121
616	Guineo-Soudanienne			268					278				188									130										169							153	155
617	Guineo-Soudanienne			268					278				188					122						134																		164					123
618	Guineo-Soudanienne								278				188											134															153		162						123
619	Guineo-Soudanienne								278				188	190										134																			166	168				125
620	Guineo-Soudanienne								278				188											134																155		164					123	125
621	Guineo-Soudanienne								278				188	190									132	134															153				166				123		127
622	Guineo-Soudanienne								278				188					122		126																				155							123		127
623	Guineo-Soudanienne			268						280			188	190			120						132																153							121			127
624	Guineo-Soudanienne								278				188					122																					153				166				123	125
625	Guineo-Soudanienne									280			188							126																				155			166				123
626	Guineo-Soudanienne							276	278				188										132																153	155							123
627	Guineo-Soudanienne							276	278				188	190										134															153			164					123
628	Guineo-Soudanienne								278				188											134																155			166				123
629	Guineo-Soudanienne								278				188					122							136														153								123	125
630	Guineo-Soudanienne							276					188	190			120																							155							123
631	Guineo-Soudanienne								278				188				120	122																					153	155							123
632	Guineo-Soudanienne							276	278				188				120							134															153							121
633	Guineo-Soudanienne									280			188				120							134																155
634	Guineo-Soudanienne							276	278				188											134															153	155							123
635	Guineo-Soudanienne								278				188				120							134																155							123	125
636	Guineo-Soudanienne								278	280			188											134			145													155								125
637	Guineo-Soudanienne								278				188							126			132																			164	166			121		125
638	Guineo-Soudanienne								278	280			188										132																153	155							123
639	Guineo-Soudanienne								278				188					122					132																153			164						125
640	Guineo-Soudanienne								278	280			188				120											147														164				121
641	Guineo-Soudanienne								278				188			118								134															153			164					123
642	Guineo-Soudanienne								278	280			188					122					132																153			164					123
643	Guineo-Soudanienne							276	278				188											134																155		164				121
644	Guineo-Soudanienne								278	280			188										132																153							121
645	Guineo-Soudanienne			268					278				188				120	122																								164	166				123	125
646	Guineo-Soudanienne								278				188					122					132																153	155							123
647	Guineo-Soudanienne							276	278				188											134				147														164	166			121	123
648	Guineo-Soudanienne								278	280			188											134	136															155		164				121	123
649	Guineo-Soudanienne		266						278				188										132					147											153			164					123
650	Guineo-Soudanienne									280			188										132																	155							123
651	Guineo-Soudanienne		266						278				188	190									132		136														153	155							123
652	Guineo-Soudanienne									280			188											134															153	155							123
653	Guineo-Soudanienne									280			188					122														169							153			164					123
654	Guineo-Soudanienne								278				188					122						134																155			166				123
655	Guineo-Soudanienne		266							280			188	190			120							134																155		164				121	123
656	Guineo-Soudanienne								278				188											134	136																	164	166				123
657	Guineo-Soudanienne								278	280			188											134															153	155						121
658	Guineo-Soudanienne								278				188								128			134															153	155							123
659	Guineo-Soudanienne									280	282		188							126				134															153	155							123
660	Guineo-Soudanienne								278	280			188					122		126																						164	166				123		127
661	Guineo-Soudanienne							276	278				188										132	134																155		164					123
662	Guineo-Soudanienne								278	280			188	190			120			126																						164	166				123
663	Guineo-Soudanienne								278	280			188											134																		164	166					125
664	Soudanienne								278				188										132																153
665	Soudanienne									280			188										132	134																		164	166				123
666	Soudanienne									280			188										132	134															153			164				121
667	Soudanienne								278	280			188											134																		164	166				123
668	Soudanienne					272				280			188							126				134																155		164					123
669	Soudanienne								278	280			188	190		118							132																153				166				123
670	Soudanienne									280			188										132																153			164
671	Soudanienne								278				188										132																153				166		117
672	Soudanienne								278	280			188			118							132																153			164							127
673	Soudanienne							276	278				188										132	134															153								123
674	Soudanienne							276					188			118																								155			166				123	125
675	Soudanienne							276	278				188			118								134																		164					123
676	Soudanienne								278	280			188										132	134																		164	166				123
677	Soudanienne								278	280			188							126				134																155						121
678	Soudanienne							276		280			188				120							134																155		164				121		125
679	Soudanienne								278	280			188				120																									164	166				123
680	Soudanienne			268					278				188				120							134																		164				121	123
681	Soudanienne								278	280			188				120								136														153	155
682	Soudanienne							276	278				188			118	120																						153			164					123		127
683	Soudanienne								278					190						126				134																155						121
684	Soudanienne								278	280			188											134																155							123
685	Soudanienne		266					276					188											134															153			164
686	Soudanienne								278				188			118							132																153				166			121
687	Soudanienne							276	278				188					122						134																		164	166				123
688	Soudanienne							276		280			188				120							134																155		164					123
689	Soudanienne		266						278				188										132																	155		164							127
690	Soudanienne								278				188											134																		164	166				123
691	Soudanienne								278				188											134			145													155		164					123
692	Soudanienne		266						278				188	190										134																155		164
693	Soudanienne			268					278				188			118							132																	155	162						123
694	Soudanienne								278	280			188				120						132																			164	166				123
695	Soudanienne								278				188										132	134															153			164					123
696	Soudanienne									280			188										132	134																155		164					123
697	Soudanienne							276	278				188							126				134																		164					123
698	Soudanienne								278				188				120						132																153								123
699	Soudanienne								278	280		184	188				120						132																153			164
700	Soudanienne								278				188	190										134												177				155							123
701	Soudanienne								278	280				190										134												177			153			164						125	127
702	Soudanienne		266						278				188			118								134																155			166			121	123
703	Soudanienne			268					278				188							126			132																153				166					125
704	Soudanienne								278				188										132																	155		164						125
705	Soudanienne							276		280			188			118							132																153	155							123	125
706	Soudanienne		266							280			188										132																	155		164					123	125
707	Soudanienne								278	280			188											134															153				166				123	125
708	Soudanienne							276		280			188											134																155		164					123	125
709	Soudanienne								278	280			188							126				134															153	155							123
710	Soudanienne							276	278				188											134																155			166			121
711	Soudanienne								278				188											134															153				166				123
712	Soudanienne								278	280			188										132	134																		164
713	Soudanienne		266						278				188										132		136															155		164					123
714	Soudanienne							276				184	188										132	134																155		164					123	125
715	Soudanienne								278				188										132	134																			166
716	Soudanienne								278				188			118												147											153
717	Soudanienne								278				188					122					132																	155			166				123
718	Soudanienne								278				188				120							134															153			164					123
719	Soudanienne								278			184	188							126			132																	155					117		123
720	Soudanienne								278				188					122						134															153	155							123
721	Soudanienne								278		282		188					122					132																153			164					123
722	Soudanienne							276		280			188										132	134																155			166				123
723	Soudanienne			268					278				188										132	134																155
724	Soudanienne								278				188	190										134															153			164					123
725	Soudanienne								278				188											134																		164	166				123
726	Soudanienne								278	280		184		190										134	136																	164	166				123
727	Soudanienne			268							282		188										132	134																		164	166				123	125
728	Soudanienne								278			184	188					122						134															153			164			117		123
729	Soudanienne			268					278			184	188									130	132																	155
730	Soudanienne								278				188					122											159										153				166				123
731	Soudanienne									280	282			190								130	132																	155			166		117
732	Soudanienne								278	280		184		190								130	132																	155			166		117
733	Soudanienne								278	280			188									130		134															153			164					123
734	Soudanienne								278				188										132																	155		164					123
735	Soudanienne							276		280		184												134																155			166				123
736	Soudanienne								278			184	188											134																155			166
737	Soudanienne								278			184	188										132	134																155					117
738	Soudanienne								278	280			188											134																155				168			123
739	Soudanienne							276	278			184										130		134																155							123
740	Soudanienne								278	280		184	188											134																155							123
741	Soudanienne								278	280			188				120								136														153							121	123
742	Soudanienne								278				188	190									132	134															153				166					125
743	Soudanienne								278	280			188							126				134																155		164
744	Soudanienne								278				188										132	134															153			164
745	Soudanienne							276		280			188	190									132														179			155		164					123		127
746	Soudanienne								278	280			188				120							134															153								123
747	Soudanienne								278		282	184	188										132													177			153					168		121	123
748	Soudanienne		266	268									188				120	122																					153				166					125
749	Soudanienne								278	280			188										132	134															153	155						121	123
750	Soudanienne								278				188	190							128			134																		164	166					125
751	Soudanienne							276	278				188	190				122			128																		153			164					123
752	Soudanienne					272			278				188											134												177			153			164
753	Soudanienne								278				188											134																		164
754	Soudanienne								278				188											134															153			164						125
755	Soudanienne								278				188											134																155			166				123
756	Soudanienne								278				188							126				134																			166
757	Soudanienne								278					190		118							132																	155		164					123
758	Soudanienne								278	280		184	188				120							134																		164						125
759	Soudanienne							276		280			188					122						134															153	155					117
760	Soudanienne								278			184	188				120	122																						155			166				123
761	Soudanienne								278	280			188					122		126																			153			164					123
762	Soudanienne								278				188										132	134																		164
763	Soudanienne								278				188								128		132																	155		164				121
764	Soudanienne			268					278				188							126				134																155		164
765	Soudanienne								278				188										132	134																		164				121
766	Soudanienne								278				188											134	136														153	155							123
767	Soudanienne								278	280			188										132	134																		164	166				123
768	Soudanienne								278				188	190				122		126																			153	155							123
769	Soudanienne								278				188															147	159										153	155
770	Soudanienne								278	280			188											134	136														153	155
771	Soudanienne								278	280			188											134	136															155		164
772	Soudanienne			268						280			188							126				134															153			164					123
773	Soudanienne								278	280			188				120						132																153			164				121	123
774	Soudanienne								278	280			188										132	134															153	155
775	Soudanienne								278	280			188										132					147											153			164					123	125
776	Soudanienne								278	280			188					122																								164					123
777	Soudanienne								278				188										132																			164	166					125
778	Soudanienne									280			188										132					147															166
779	Soudanienne								278				188					122					132																	155		164						125
780	Soudanienne								278				188										132	134																		164					123
781	Soudanienne								278	280			188										132	134																155		164						125
782	Soudanienne			268					278				188					122						134															153				166
783	Soudanienne								278				188										132	134															153				166
784	Soudanienne								278				188										132	134															153	155							123	125
785	Soudanienne								278				188														145												153								123
786	Soudanienne								278				188	190		118								134															153			164					123
787	Soudanienne								278				188											134																		164	166
788	Soudanienne		266						278				188										132																153							121
789	Soudanienne								278				188					122						134															153								123
790	Soudanienne								278				188				120						132																153	155						121
791	Soudanienne								278				188					122						134															153	155						121	123
792	Soudanienne								278				188									130		134																155			166			121
793	Soudanienne								278	280		184	188											134															153				166				123
794	Soudanienne								278	280			188											134															153				166
795	Soudanienne							276	278				188	190										134																		164	166					125
796	Soudanienne								278	280			188										132	134																		164				121
797	Soudanienne								278	280			188					122						134																155			166				123		127
798	Soudanienne								278				188	190									132	134															153							121	123
799	Soudanienne			268						280			188											134	136														153	155							123
800	Soudanienne								278				188											134				147											153							121
801	Soudanienne								278				188					122						134															153
802	Soudanienne								278			184	188										132																153	155								125
803	Soudanienne								278				188	190				122					132																	155		164				121
804	Soudanienne								278				188				120						132																153			164					123
805	Soudanienne								278				188											134	136														153	155							123
806	Soudanienne								278				188										132																153			164					123
807	Soudanienne								278				188			118								134															153				166			121
808	Soudanienne								278				188						124				132																			164				121	123
809	Soudanienne							276		280			188					122																					153							121		125
810	Soudanienne								278	280			188					122										147														164	166			121
811	Soudanienne								278				188					122						134															153				166					125
812	Soudanienne								278	280			188									130	132																153
813	Soudanienne								278				188										132	134																155			166
814	Soudanienne								278				188										132	134															153				166			121
815	Soudanienne								278	280			188					122				130																	153				166				123	125
816	Soudanienne			268					278				188									130						147											153				166			121
817	Soudanienne									280			188									130		134																155		164
818	Soudanienne			268					278				188					122																					153									125	127
819	Soudanienne								278	280			188															147	159										153				166
820	Soudanienne								278				188											134				147											153					168			123
821	Soudanienne									280			188											134				147												155								125
822	Soudanienne									280			188					122					132																			164	166			121		125
823	Soudanienne								278	280			188	190									132																153			164					123
824	Soudanienne								278				188											134															153	155									127
825	Soudanienne								278	280			188					122					132																153			164					123
826	Soudanienne								278	280			188									130						147														164	166			121
827	Soudanienne								278				188											134				147															166				123
828	Soudanienne								278	280			188									130		134															153				166			121
829	Soudanienne			268					278				188										132	134																		164							127
830	Soudanienne								278	280			188										132																153			164				121	123
831	Soudanienne									280			188											134															153					168					127
832	Soudanienne								278	280			188					122					132																			164	166				123
833	Soudanienne									280			188									130	132																153			164				121
834	Soudanienne								278	280			188									130						147														164					123
835	Soudanienne								278	280			188										132																			164					123
836	Soudanienne								278				188					122											159										153			164
837	Soudanienne								278	280			188									130							159										153								123
838	Soudanienne								278				188										132																	155							123
839	Soudanienne								278	280			188				120						132																153			164				121
840	Soudanienne								278	280			188															147	159										153
841	Soudanienne								278	280			188										132						159										153				166			121
842	Soudanienne								278				188	190									132	134																		164
843	Soudanienne			268					278				188										132	134															153	155							123
844	Soudanienne									280			188											134			145															164	166
845	Soudanienne			268					278				188					122						134															153								123
846	Soudanienne								278				188										132	134																		164	166			121
847	Soudanienne			268						280			188					122											159										153			164							127
848	Soudanienne								278				188										132	134																			166
849	Soudanienne								278				188									130	132																			164	166				123
850	Soudanienne			268					278				188										132																153			164				121
851	Soudanienne								278				188										132					147											153				166			121
852	Soudanienne								278	280			188										132																153				166			121
853	Soudanienne								278				188						124				132																153			164						125
854	Soudanienne								278	280			188										132														179		153			164				121	123
855	Soudanienne								278				188										132																			164					123
856	Soudanienne								278				188					122					132																153				166				123
857	Soudanienne								278				188										132	134															153				166				123	125
858	Soudanienne								278				188										132					147												155		164				121	123
859	Soudanienne								278				188										132																153				166				123
860	Soudanienne								278	280			188					122										147											153							121	123
861	Soudanienne								278				188					122						134															153										127
862	Soudanienne								278	280			188	190			120						132																153				166
863	Soudanienne								278				188										132																153				166
864	Soudanienne								278				188					122					132																153				166			121
865	Soudanienne								278	280			188										132	134															153	155						121
866	Soudanienne							276		280		184	188										132	134																			166					125
867	Soudanienne								278				188			118																								155			166				123
868	Soudanienne								278				188									130	132																				166			121	123
869	Soudanienne								278	280			188										132														179					164	166			121	123
870	Soudanienne								278	280			188										132				145												153			164				121
871	Soudanienne								278	280			188					122																					153				166			121
872	Soudanienne								278	280			188					122									145												153	155						121
873	Soudanienne								278	280			188										132	134															153				166			121	123
874	Soudanienne								278	280		184	188											134				147														164	166			121	123
875	Soudanienne								278	280			188					122						134															153								123
876	Soudanienne			268					278				188											134																155			166				123
877	Soudanienne								278	280			188										132	134															153			164
878	Soudanienne								278				188					122						134															153				166				123
879	Soudanienne								278	280			188										132	134															153			164
880	Soudanienne								278				188										132	134															153			164				121	123
881	Soudanienne								278			184	188									130	132																					168		121	123
882	Soudanienne								278	280			188					122										147											153				166			121
883	Soudanienne								278			184	188										132	134																155				168		121	123
884	Soudanienne								278				188										132	134																		164	166			121
885	Soudanienne								278				188										132	134															153			164				121
886	Soudanienne								278				188										132	134															153	155						121		125
887	Soudanienne								278				188										132	134															153									125
888	Soudanienne								278	280			188											134																		164	166			121	123
889	Soudanienne									280			188				120							134															153	155							123		127
890	Soudanienne								278				188					122						134																			166						127
891	Soudanienne								278			184						122					132																153			164
892	Soudanienne								278	280			188											134																		164	166				123
893	Soudanienne								278				188										132	134																155							123
894	Soudanienne								278				188										132	134															153			164						125
895	Soudanienne								278		282		188					122					132																153				166
896	Soudanienne			268					278				188										132	134															153			164					123
897	Soudanienne								278	280			188				120							134															153							121	123
898	Soudanienne		266						278				188					122						134															153								123
899	Soudanienne							276	278				188	190				122						134															153				166				123
900	Soudanienne								278				188	190										134													179			155		164
901	Soudanienne							276	278				188				120							134																155			166				123	125
902	Soudanienne								278				188		192					126				134															153	155
903	Soudanienne								278	280			188				120	122																					153			164
904	Soudanienne		266					276					188					122		126																						164	166				123
905	Soudanienne		266						278			184	188										132																				166			121
906	Soudanienne								278				188					122									145												153			164					123
907	Soudanienne							276		280			188											134			145													155		164					123	125
908	Soudanienne								278				188						124				132																153			164
909	Soudanienne								278				188		192								132	134															153								123
910	Soudanienne								278				188				120										145												153									125
911	Soudanienne								278	280			188											134			145																166			121
912	Soudanienne			268					278				188											134																155		164				121	123
913	Soudanienne						274			280			188		192									134			145												153	155							123
914	Soudanienne								278				188					122						134																		164					123
915	Soudanienne								278				188					122						134																155				168
916	Soudanienne								278				188											134																		164	166				123
917	Soudanienne									280			188											134															153				166				123
918	Soudanienne								278	280			188							126			132																153										127
919	Soudanienne								278				188						124					134															153			164						125
920	Soudanienne								278				188	190									132	134															153									125
921	Soudanienne		266						278				188					122						134															153				166				123
922	Soudanienne								278	280			188										132		136																162		166			121
923	Soudanienne								278	280			188			118						130																		155			166				123
924	Soudanienne								278				188			118							132																153	155							123
925	Soudanienne								278	280			188					122											159										153	155								125
926	Soudanienne								278	280			188					122										147															166	168				125
927	Soudanienne								278				188					122										147												155				168		121
928	Soudanienne								278	280			188					122					132																153							121		125
929	Soudanienne								278				188					122						134																			166
930	Soudanienne							276		280			188									130		134															153				166			121	123
931	Soudanienne								278				188					122																			179			155			166					125
932	Soudanienne								278				188			118		122																					153				166				123
933	Soudanienne		266						278				188	190				122					132																153				166			121	123
934	Soudanienne								278				188	190				122						134																155			166			121	123
935	Soudanienne								278				188					122					132																153							121	123
936	Soudanienne									280			188											134																		164					123	125
937	Soudanienne								278				188			118							132																				166	168			123
938	Soudanienne								278				188											134																155		164					123
939	Soudanienne								278	280			188							126				134																		164	166
940	Soudanienne								278	280			188	190				122										147															166
941	Soudanienne								278	280			188											134				147											153			164
942	Soudanienne								278	280			188										132																	155		164				121	123
943	Soudanienne								278	280			188	190				122																						155			166				123
944	Soudanienne			268					278				188				120	122																					153				166					125
945	Soudanienne								278	280			188											134				147											153								123
946	Soudanienne								278	280			188											134				147											153			164				121			127
947	Soudanienne									280			188										132					147											153								123
948	Soudanienne								278	280			188	190										134																		164	166			121
949	Soudanienne								278				188										132	134																155		164				121
950	Soudanienne								278	280			188					122						134																		164				121		125
951	Soudanienne								278		282		188					122		126																						164
952	Soudanienne								278				188										132																153
953	Soudanienne								278				188										132																	155		164						125
954	Soudanienne								278	280			188	190									132	134																			166					125
[truncated: 87 more columns]
